# Supplementary material for: Mesenchymal stem cell transplantation alleviates experimental Sjögren's syndrome through IFN-β/IL-27 signaling axis
Source: PubMed Central journal article supplement (PMC6857067; doi:10.7150/thno.37351), 2019-10-21
Supplement: thnov09p8253s1.pdf [file thnov09p8253s1.pdf]

## Supplemental materials

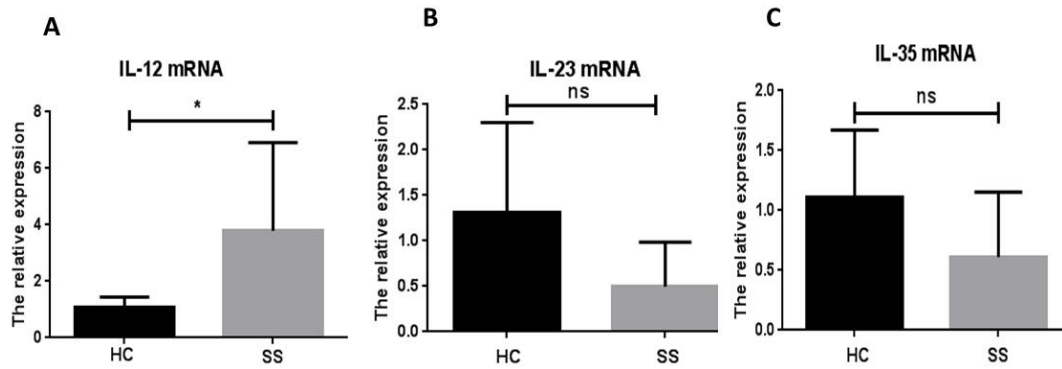

**Figure S1** IL-12, 23 and 35 mRNA expressions in PBMCs. (A) IL-12 mRNA was elevated in SS patients, compared with healthy controls. (B and C) IL-23 and 35 mRNA expression was comparable between SS patients and healthy controls.

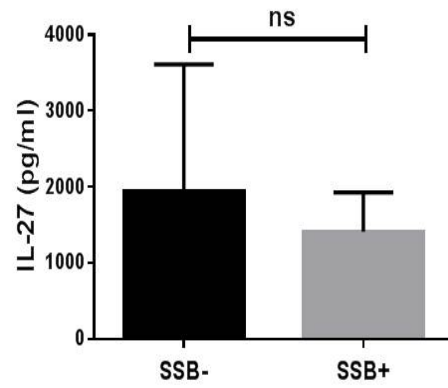

**Figure S2** IL-27 correlated with autoantibodies in patients with SS. Serum IL-27 tended to reduce in SS patients with anti-SSB antibody.

**A**

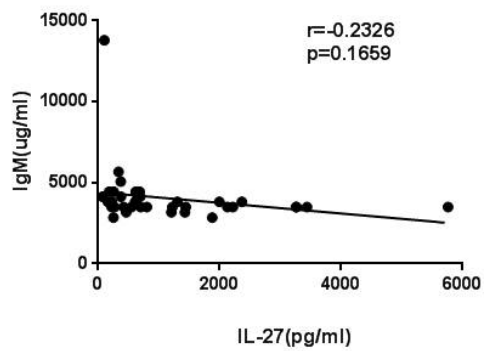

**B**

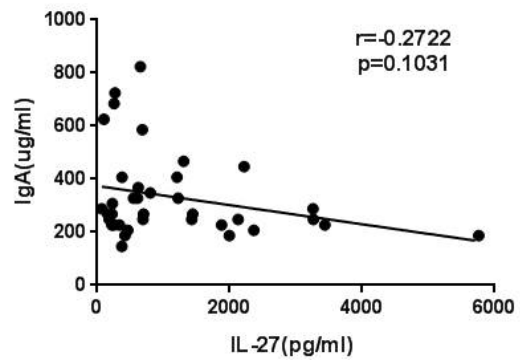

**Figure S3** IL-27 correlated with immunoglobulin M and A in patients with SS. ( A and B) IL-27 showed a negative correlation with IgM and IgA in SS patients.



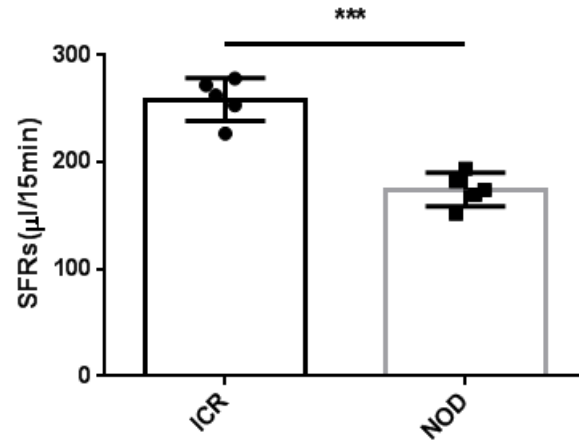

**Figure S4** Salivary flow rates were measured in ICR and NOD mice (n=5).

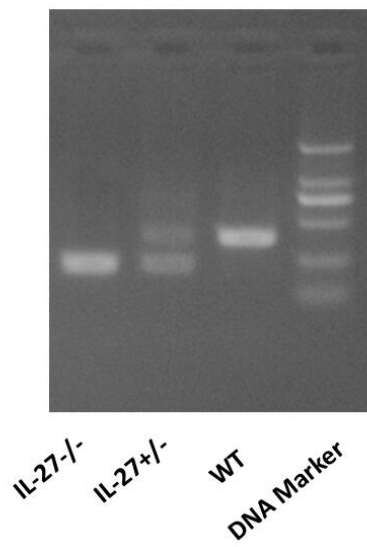

**Figure S5** The genotype of IL-27<sup>-/-</sup> NOD mice. The genotype was determined by PCR.

**A**

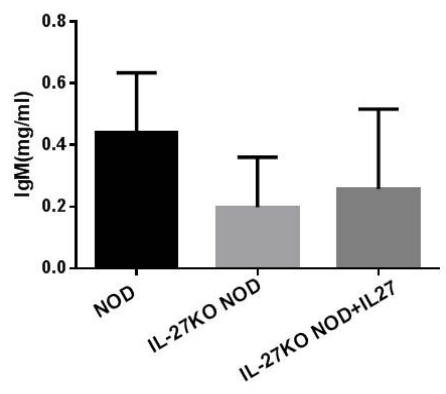

**B**

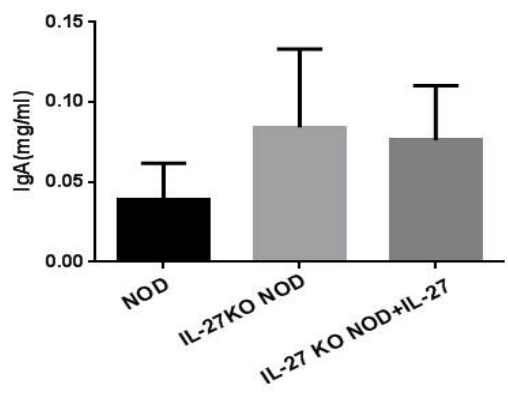

**Figure S6** IgM and IgA in IL-27 KO mice. (A and B) IgM and IgA were comparable among WT, IL-27 KO, IL-27 KO with recombinant IL-27 treatment NOD mice.

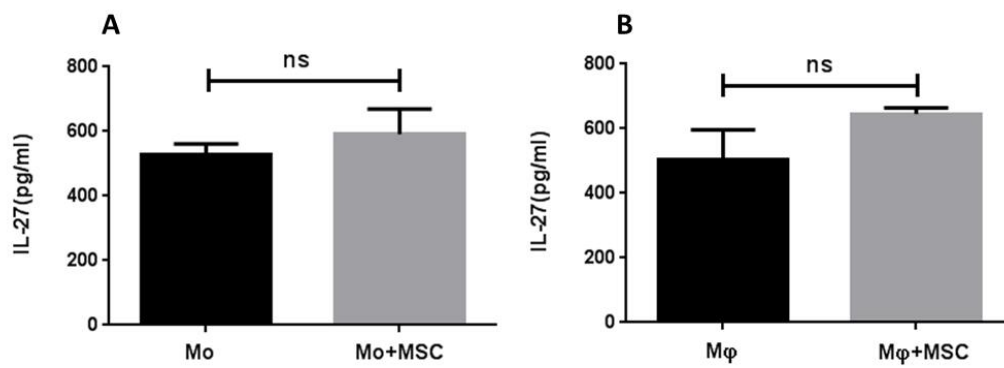

**Figure S7** Mesenchymal stem cells promote the production of IL-27 by macrophages and monocytes. (A and B) Supernatants of macrophages



and monocytes with MSC treatment showed a tendency of increased IL-27 levels.

**Supplementary Table 1** Baseline clinical characteristics and medications for the SS patients

| <b>Patient</b> | <b>Age/sex</b> | <b>Disease duration</b> | <b>ESSDAI</b> | <b>Medication</b> |
|----------------|----------------|-------------------------|---------------|-------------------|
|                |                | (months)                |               |                   |

---

|    |      |     |    |                          |
|----|------|-----|----|--------------------------|
| 1  | 49/F | 12  | 4  | Pred,HCQ,CYC             |
| 2  | 22/F | 72  | 3  | Pred,HCQ,CYC             |
| 3  | 53/F | 24  | 3  | Pred,HCQ,LEF             |
| 4  | 51/F | 9   | 5  | Pred,HCQ, CYC            |
| 5  | 50/F | 24  | 6  | Pred,HCQ,CYC,LEF         |
| 6  | 26/F | 1   | 5  | No medication            |
| 7  | 73/F | 36  | 5  | Pred,HCQ,CYC             |
| 8  | 59/F | 60  | 5  | Pred,HCQ,cyclosporin     |
| 9  | 61/M | 24  | 1  | Pred,HCQ,LEF             |
| 10 | 52/F | 84  | 9  | Pred,HCQ,Tacrolimus      |
| 11 | 46/F | 24  | 6  | Pred,HCQ,CYC,cyclosporin |
| 12 | 55/F | 1   | 8  | No medication            |
| 13 | 52/F | 60  | 4  | Pred                     |
| 14 | 53/F | 240 | 13 | Pred,HCQ,CYC,LEF         |
| 15 | 70/F | 24  | 3  | Pred,HCQ,                |
| 16 | 53/M | 120 | 5  | Pred,HCQ,                |
| 17 | 43/F | 2   | 5  | Pred                     |
| 18 | 36/M | 6   | 7  | Pred,HCQ,CYC, Triptolide |
| 19 | 63/F | 36  | 2  | Pred,HCQ,                |
| 20 | 34/F | 120 | 4  | Pred                     |
| 21 | 54/F | 1   | 1  | No medication            |
| 22 | 34/F | 120 | 6  | Pred,HCQ                 |
| 23 | 60/F | 72  | 5  | Pred,HCQ,LEF             |
| 24 | 20/F | 12  | 8  | Pred,HCQ,CYC,LEF         |

---

|    |      |     |    |                               |
|----|------|-----|----|-------------------------------|
| 25 | 55/F | 84  | 8  | Pred,HCQ,CYC,LEF              |
| 26 | 44/F | 6   | 4  | Pred,HCQ, Triptolide          |
| 27 | 57/M | 24  | 7  | Pred,HCQ,CYC, cyclosporin     |
| 28 | 64/M | 120 | 7  | Pred,HCQ, CYC                 |
| 29 | 29/F | 72  | 6  | Pred,HCQ,LEF                  |
| 30 | 53/F | 96  | 4  | Pred,HCQ,CYC                  |
| 31 | 60/F | 240 | 8  | Pred,HCQ                      |
| 32 | 32/F | 3   | 10 | Pred,HCQ, CYC,LEF, Tacrolimus |
| 33 | 39/F | 72  | 8  | Pred,HCQ,CYC                  |
| 34 | 73/F | 240 | 6  | Pred                          |
| 35 | 52/F | 60  | 7  | Pred,HCQ, Tacrolimus          |
| 36 | 46/M | 36  | 3  | Pred,HCQ, CYC                 |
| 37 | 49/F | 6   | 11 | Pred,HCQ,LEF                  |
| 38 | 45/F | 12  | 5  | Pred,HCQ, CYC                 |

Pred, prednisone; HCQ, hydroxychloroquine; CYC, cyclophosphamine; LEF, leflunomide;

### Supplementary Table 2. Primers for real-time PCR

| Gene(human) | Primers                              | Product length(bp) |
|-------------|--------------------------------------|--------------------|
| IL-27       | Forward 5'-TGCCAGGAGTGAACCTGTACC -3' |                    |
|             | Reverse 5'-CGTGGTGGAGATGAAGCAGA -3'  | 119                |
| IL-12       | Forward 5'-AGGAATGTTCCCATGCCTTCA-3'  |                    |
|             | Reverse 5'-CCAATGGTAAACAGGCCTCCAC-3' | 170                |

---

|        |         |                                 |     |
|--------|---------|---------------------------------|-----|
| IL-23  | Forward | 5'-GAACAACTGAGGGAACCAAACC -3'   |     |
|        | Reverse | 5'-GAATCTCTGCCCACTTCCACTT -3'   | 80  |
| IL-35  | Forward | 5'-GACCTCACAGACTACGGGGAAC -3'   |     |
|        | Reverse | 5'-CGGGAAGCCCTTGCTACTT -3'      | 85  |
| WSX-1  | Forward | 5'-CCACCTACATGGCCATCTCATAAA-3'  |     |
|        | Reverse | 5'-GCCAGTGGCTAGCTCCAAATC-3'     | 147 |
| gp-130 | Forward | 5'-CTGGGAGTGCTGTTCTGCTTTAATA-3' |     |
|        | Reverse | 5'-TGAGGTGACCACTGGGCAATA-3'     | 104 |
| GAPDH  | Forward | 5'-GCACCGTCAAGGCTGAGAAC-3'      |     |
|        | Reverse | 5'-TGGTGAAGACGCCAGTGGA-3'       | 100 |

---
